# Supplementary material for: Dynamic finite-element model for efficient modelling of electric currents in electroporated tissue
Source: PubMed Central journal article supplement (PMC4876422; doi:10.1038/srep26409), 2016-05-23
Supplement: srep26409-s1.pdf [file srep26409-s1.pdf]

## Dynamic finite-element model for efficient modelling of electric currents in electroporated tissue

J. Langus<sup>1</sup>, M. Kranjc<sup>2</sup>, B. Kos<sup>2</sup>, T. Šuštar<sup>1</sup>, D. Miklavčič<sup>2\*</sup>

<sup>1</sup> C3M d.o.o., Technology park 21, SI-1000 Ljubljana, Slovenia

<sup>2</sup> University of Ljubljana, Faculty of Electrical Engineering, Laboratory of Biocybernetics (Prof. Damijan Miklavcic, Ph.D.), Tržaška 25, 1000 Ljubljana, Slovenia

Contact: Prof. Damijan Miklavcic, Ph.D.

Tel/fax: +386 1 4768 456 / +386 1 4264 658

email: [damijan.miklavcic@fe.uni-lj.si](mailto:damijan.miklavcic@fe.uni-lj.si)

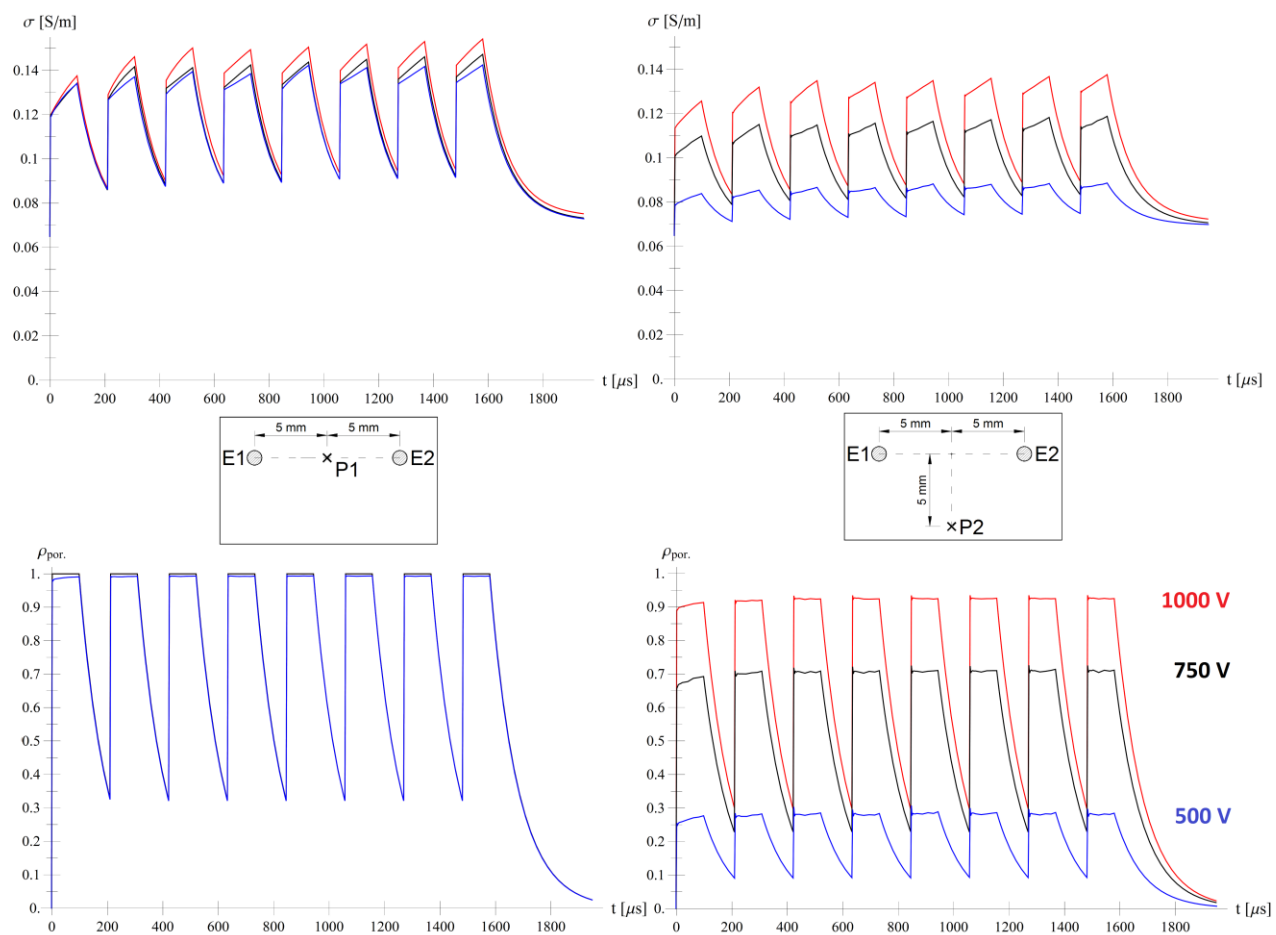

Supplementary Figure S1: Time evolution of calculated tissue conductivity  $\sigma$  (top row) and calculated quantity  $\rho_{por.}$  (bottom row) in central point between electrodes (left, P1) and 5 mm from central line (right, P2) for (short pulse duration, high pulse repetition frequency).

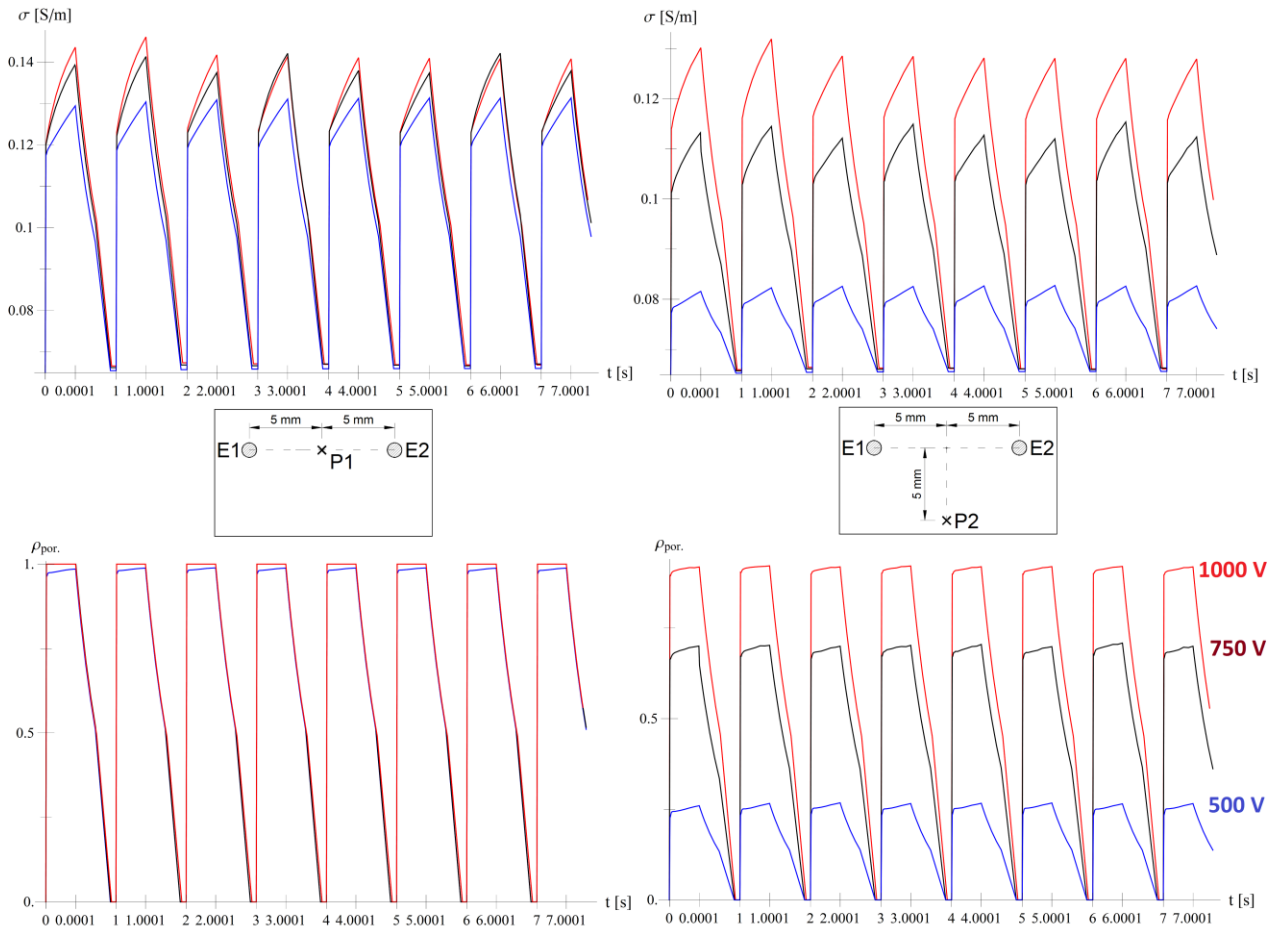

Supplementary Figure S2: Time evolution of calculated tissue conductivity  $\sigma$  (top row) and calculated quantity  $\rho_{por.}$  (bottom row) in central point between electrodes (left, P1) and 5 mm from central line (right, P2) for (short pulse duration, low pulse repetition frequency).
